# Supplementary material for: Effects of Dietary Supplementation with Honeybee Pollen and Its Supercritical Fluid Extract on Immune Response and Fillet’s Quality of Farmed Gilthead Seabream (Sparus aurata)
Source: MDPI journal article supplement (doi:10.3390/ani12060675), 2022-03-08
Supplement: s1 [file s1]

**Table S1.** Fatty acid profile (%) of honeybee pollen (HBP) and supercritical fluid extract (SFE) of HBP (HBP\_SFE).

| Fatty acids | HBP        | HBP_SFE    |
|-------------|------------|------------|
| C14:0       | 0.58±0.06  | 0.76±0.02  |
| C16:0       | 24.82±0.06 | 24.51±0.20 |
| C16:1n-7    | 0.17±0.00  | 0.19±0.00  |
| C16:2n-4    | 1.59±0.21  | 2.56±0.05  |
| C17:0       | 0.11±0.02  | 0.18±0.01  |
| C16:3n-4    | 0.22±0.01  | 0.24±0.01  |
| C18:0       | 2.02±0.08  | 2.20±0.08  |
| C18:1n-9    | 5.72±0.41  | 6.93±0.17  |
| C18:1n-7    | 0.74±0.01  | 0.68±0.02  |
| C18:2n-6    | 16.54±0.36 | 14.26±0.24 |
| C18:3n-3    | 42.86±1.20 | 43.53±0.48 |
| C20:1n-9    | 1.15±0.12  | 1.53±0.03  |
| C22:1n-11   | 1.83±0.19  | 2.44±0.05  |
| C22:1n-9    | 1.66±0.19  | n.d.       |
| Σ SFA       | 27.53±0.10 | 27.64±0.09 |
| Σ MUFA      | 11.27±0.53 | 11.77±0.28 |
| Σ PUFA      | 61.21±0.63 | 60.59±0.18 |
| Σ n-6PUFA   | 42.86±1.20 | 43.53±0.48 |
| Σ n-3PUFA   | 16.54±0.35 | 14.26±0.24 |

n.d.: not detected.

**Table S2.** Growth performance indexes of gilthead sea bream fed on diets added with 5% or 10% of raw HBP (diets P5 and P10) and 0.5% or 1% of HBP-SFE (diets E05 and E1).

|      | <b>CONTR</b> | <b>P5</b> | <b>P10</b> | <b>E0.5</b> | <b>E1</b> | <b><i>p</i>-Value</b> | <b>RMSE</b> |
|------|--------------|-----------|------------|-------------|-----------|-----------------------|-------------|
| IBW  | 296.1        | 297.8     | 289.8      | 295.2       | 294.8     | 0.9709                | 14.80       |
| FBW  | 343.6        | 347.6     | 318.0      | 335.3       | 336.7     | 0.2466                | 15.50       |
| FCR  | 1.92         | 1.78      | 3.59       | 2.28        | 2.13      | 0.0807                | 0.74        |
| SGR  | 0.47         | 0.48      | 0.29       | 0.40        | 0.42      | 0.1719                | 0.09        |
| DIR‰ | 8.58         | 8.51      | 9.04       | 8.74        | 8.71      | 0.5600                | 0.40        |
| WG%  | 16.16        | 16.74     | 9.74       | 13.67       | 14.25     | 0.1803                | 3.43        |
| PER  | 1.26         | 1.32      | 0.75       | 1.06        | 1.11      | 0.1008                | 0.24        |

IBW = Initial Body Weight; FBW = Final Body Weight; Feed conversion ratio (FCR) = [total feed supplied (g)/weight gain (g)]; Specific growth rate (SGR, %/day) =  $[(\ln \text{FBW} - \ln \text{IBW}) / \text{number of feeding days}] * 100$ ; Daily intake rate (DIR, ‰/day) =  $1000 * [(\text{feed intake (g)} / \text{mean weight (g)}) / \text{days}]$ ; Weight gain (WG%) =  $100 * [(\text{FBW (g)} - \text{IBW (g)}) / \text{IBW (g)}]$ ; Protein efficiency ratio (PER) = [weight gain (g)/total protein fed (g)].
